# Supplementary material
Source: PubMed Central journal article supplement (PMC3507433)
Supplement: NIHMS421330-supplement-01.pdf [file NIHMS421330-supplement-01.pdf]

## Supplement 1

### S1. Methods of computer simulation

We assume that the thalamic output can be described by a single variable, the bursting rate of relay cells (in particular in nucleus reuniens). We know that NMDAR antagonist stimulates burst output of relay cells (1). However, there are no recordings yet of single-unit activity from nucleus reuniens in the presence of NMDAR blocker. We assume that this activity is the same as that of nRT cells, from which recordings have been made in the slice preparation (2). We model nRT cells as not bursting if the resting potential is above a critical threshold voltage. Both dopamine and NMDAR antagonists produce hyperpolarization (these influences sum linearly); once a critical hyperpolarization is reached, bursting is proportional to the additional hyperpolarization. We assume that bursts in relay cells are driven by bursts from nRT (relay cells will fire at the cessation of inhibitory input). The excitation of the hippocampus is proportional to the excitation from the thalamus and the feedback inhibition from hippocampal interneurons. The VTA fires in proportion to the sum of hippocampal input and a term that represents the effect of stress. The overall simulation involves coupling these equations to reveal the dynamics of the system as a whole.

The hippocampal activity is described as a firing rate model (3).

$$(1) \quad \tau_H \frac{d}{dt} H = -H + F(I) + \text{baseline}$$

in which  $H$  represents the activity of the hippocampal principal cells, *baseline* is the basal activity,  $\tau_r$  is a relaxation time constant, and  $F(I)$  is

$$(2) \quad F(I) = \text{Excitation} + \text{Inhibition}$$

The hippocampus receives excitatory inputs from the thalamus, which has activity  $R$ ,

$$(3) \quad \text{Excitation} = k_1 R$$

We assume  $R$  is the bursting of the relay cells, which is triggered by hyperpolarization of membrane potential ( $V$ ) (which deinactivate T-type  $\text{Ca}^{2+}$  channels; see 2.1 in the text). Bursting occurs when the membrane potential is hyperpolarized below a critical threshold level ( $V_{th}$ ).

$$(4) \quad R = k_3(V_{th} - V) \quad , \quad \text{when } V_{th} > V \\ = 0, \quad \text{otherwise}$$

$V$  is hyperpolarized by dopamine ( $D$ ) that is released from VTA and NMDAR antagonist ( $\text{NMDAR}_{antagonist}$ ).

$$(5) \quad V = k_4 \left( \frac{D}{K_V + D} + k_{NR} k_2 \frac{\text{NMDAR}_{antagonist}}{K_A + \text{NMDAR}_{antagonist}} \right)$$

in which  $K_V$  and  $K_A$  are half-maximum concentrations of dopamine and NMDAR antagonist, respectively.

The hippocampal activity and the level of stress increase the amount of dopamine release.

$$(6) \quad D = k_5 H + k_s \text{stress}$$

$k_1, k_2, k_3, k_4, k_5, k_s,$  and  $k_{NR}$  are unit conversion factors.

Inhibitory input to the hippocampus (*inhibition*) is provided from inhibitory interneurons in the hippocampus that are excited by the principle cells. Inhibition keeps the level of hippocampal activity to the control level ( $C=0.045$ ).

$$(7) \quad \text{Inhibition} = -I_{\max} \frac{G(H - C)}{K_I + G(H - C)}$$

in which  $I_{\max}$  is the maximum inhibition,  $G$  is a gain, and  $K_I$  is a half-maximum activity of the controlled hippocampal activity.

Parameters of the model are listed in Table S1. The numerical simulations were done with the fourth-order Runge-Kutta method using MATLAB (version 7.0, The MathWorks Inc.).

**Table S1.** Simulation parameters

|                                   |                      |
|-----------------------------------|----------------------|
| $k_1$                             | 14                   |
| $k_2$                             | 1                    |
| $k_3$                             | 1                    |
| $k_4$                             | -2                   |
| $k_5$                             | 10                   |
| $k_S$                             | 0.1                  |
| $k_{NR}$                          | 0.05                 |
| $I_{\max}$                        | 7                    |
| $G$                               | 100                  |
| $\tau_r$                          | 1                    |
| $K_I$                             | 5                    |
| $K_v$                             | 5                    |
| $K_H$                             | 1                    |
| $K_A$                             | 1                    |
| <b>baseline</b>                   | 0.05                 |
| $V_{th}$                          | -0.15                |
| $C$                               | 0.045                |
| <b>stress</b>                     | 0 (normal condition) |
| <b>NMDAR<sub>antagonist</sub></b> | 0 (normal condition) |

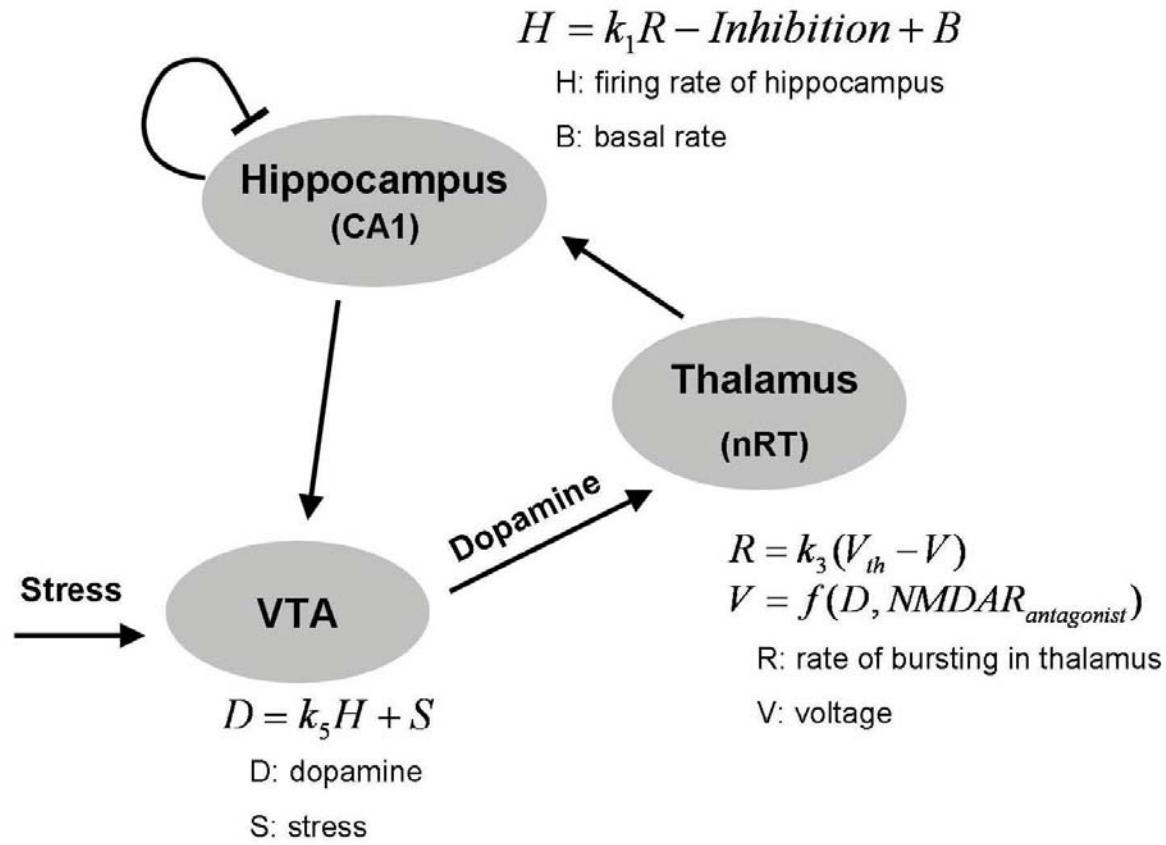

**Figure S1.** Diagram of loop interactions in the computational model. Equations describe the factors that control firing in the region.

## **S2. Dopaminergic innervation of thalamus**

It was originally thought that the dopaminergic innervation of the thalamus is negligible, but later anatomical work provided strong evidence for such innervation (reviewed in (4)). As judged by dopamine and DAT immunoreactivity, the most dopamine-reach thalamic nuclei in primates are the mediodorsal and midline nuclei. Also strongly innervated is the nRT (5-7). The presence of D2-type DA receptors in some nuclei was reported in primates (8). Tracing studies suggest that the mediodorsal nucleus gets dopamine from meso-cortical system (VTA and dorsal portion of substantia nigra) (9). Other work suggests that virtually all dopaminergic nuclei project to the primate thalamus (7).

Dopaminergic innervation is also present in rats. Thalamic D1- and D2-type ligand binding was reported in multiple studies (10-13). Also, D1 (14), D5 (15), and D4 (16) protein immunoreactivity in thalamus was demonstrated. The strongest dopaminergic markers are present in the reticular nucleus (5). VTA supplies dopamine to a number of nuclei in the rat thalamus (anterodorsal, mediodorsal, centromedial, reuniens; reviewed in (4)). Later studies confirmed that nucleus reuniens (17) and mediodorsal nucleus (18) get afferents from VTA. The reticular nucleus gets dopamine mostly from substantia nigra compacta (19), but axons from VTA were also reported (20).

1. Buzsáki G (1991): The thalamic clock: emergent network properties. *Neuroscience* 41(2-3):351-364.
2. Zhang Y, Llinas RR, Lisman JE (2009): Inhibition of NMDARs in the nucleus reticularis of the thalamus produces delta frequency bursting. *Front Neural Circuits* 3:20.
3. Dayan P, Abbot LF (2001): *Theoretical Neuroscience*. Cambridge, MA: The MIT Press, p 460.
4. Oades RD, Halliday GM (1987): Ventral tegmental (A10) system: neurobiology. 1. Anatomy and connectivity. *Brain Res* 434(2):117-165.
5. Garcia-Cabezas MA, Martinez-Sanchez P, Sanchez-Gonzalez MA, Garzon M, Cavada C (2009): Dopamine Innervation in the Thalamus: Monkey versus Rat. *Cereb Cortex* 19(2):424-34.
6. Garcia-Cabezas MA, Rico B, Sanchez-Gonzalez MA, Cavada C (2007): Distribution of the dopamine innervation in the macaque and human thalamus. *Neuroimage* 34(3):965-984.
7. Sanchez-Gonzalez MA, Garcia-Cabezas MA, Rico B, Cavada C (2005): The primate thalamus is a key target for brain dopamine. *J Neurosci* 25(26):6076-6083.
8. Mrzljak L, Bergson C, Pappy M, Huff R, Levenson R, Goldman-Rakic PS (1996): Localization of dopamine D4 receptors in GABAergic neurons of the primate brain. *Nature* 381(6579):245-248.
9. Melchitzky DS, Erickson SL, Lewis DA (2006): Dopamine innervation of the monkey mediodorsal thalamus: Location of projection neurons and ultrastructural characteristics of axon terminals. *Neuroscience* 143(4):1021-1030.

10. Janowsky A, Neve KA, Kinzie JM, Taylor B, de Paulis T, Belknap JK (1992): Extrastriatal dopamine D2 receptors: distribution, pharmacological characterization and region-specific regulation by clozapine. *J Pharmacol Exp Ther* 261(3):1282-1290.
11. Levant B (1998): Differential distribution of D3 dopamine receptors in the brains of several mammalian species. *Brain Res* 800(2):269-274.
12. Mukherjee J, Yang ZY, Brown T, Lew R, Wernick M, Ouyang X, *et al.* (1999): Preliminary assessment of extrastriatal dopamine D-2 receptor binding in the rodent and nonhuman primate brains using the high affinity radioligand, 18F-fallypride. *Nucl Med Biol* 26(5):519-527.
13. Sharif NA, Nunes JL, Rosenkranz RP, Whiting RL, Eglen RM (1995): Quantitative autoradiography demonstrates selective modulation of rat brain regional dopamine (D1 and D2) receptor subtypes after chronic manipulation of dietary salt. *Neurochem Res* 20(2):121-128.
14. Huang Q, Zhou D, Chase K, Gusella JF, Aronin N, DiFiglia M (1992): Immunohistochemical localization of the D1 dopamine receptor in rat brain reveals its axonal transport, pre- and postsynaptic localization, and prevalence in the basal ganglia, limbic system, and thalamic reticular nucleus. *Proc Natl Acad Sci U S A* 89(24):11988-11992.
15. Khan ZU, Gutiérrez A, Martín R, Peñafiel A, Rivera A, de la Calle A (2000): Dopamine D5 receptors of rat and human brain. *Neuroscience* 100(4):689-699.
16. Ariano MA, Wang J, Noblett KL, Larson ER, Sibley DR (1997): Cellular distribution of the rat D4 dopamine receptor protein in the CNS using anti-receptor antisera. *Brain Res* 752(1-2):26-34.

17. McKenna JT, Vertes RP (2004): Afferent projections to nucleus reuniens of the thalamus. *J Comp Neurol* 480(2):115-142.
18. Del-Fava F, Hasue RH, Ferreira JG, Shammah-Lagnado SJ (2007): Efferent connections of the rostral linear nucleus of the ventral tegmental area in the rat. *Neuroscience* 145(3):1059-1076.
19. Anaya-Martinez V, Martinez-Marcos A, Martinez-Fong D, Aceves J, Eriş D (2006): Substantia nigra compacta neurons that innervate the reticular thalamic nucleus in the rat also project to striatum or globus pallidus: implications for abnormal motor behavior. *Neuroscience* 143(2):477-486.
20. Cavdar S, Onat FY, Cakmak YO, Yananli HR, Gülçebi M, Aker R (2008): The pathways connecting the hippocampal formation, the thalamic reuniens nucleus and the thalamic reticular nucleus in the rat. *J Anat* 212(3):249-256.
